# Supplementary material for: Mechanistic Insights into Cannabidiol-Mediated TrkB Activation via FRS2 Interaction in Attenuating Alzheimer's Disease Pathology and Cognitive Impairment
Source: Research Square preprint supplement (doi:10.21203/rs.3.rs-6659468/v1), 2025-07-28

### Mechanistic Insights into Cannabidiol-Mediated TrkB Activation via FRS2 Interaction in Attenuating Alzheimer's Disease Pathology and Cognitive Impairment

Jiantao Liu1,5 #, Feiyuan Peng1 #, Chuangyu Yao1, Sha Jin2,3, Guoli Wu1, Tianshu Zhang2,3, Xiaohui Wang2,3,4*, Xiubo Du1*

1College of Life Sciences and Oceanography, Shenzhen University, Shenzhen, Guangdong, 518055, China

2Laboratory of Chemical Biology, Changchun Institute of Applied Chemistry, Chinese Academy of Sciences, Changchun, 130022, China

3School of Applied Chemistry and Engineering, University of Science and Technology of China, Hefei, 230026, China

4State Key Laboratory of Brain Machine Intelligence, Zhejiang University, Hangzhou, 310027, China

4Sino-German Joint Research Lab for Space Biomaterials and Translational Technology, Synergetic innovation Center of Biological Optoelectronics and Healthcare Engineering, School of Life Sciences, Northwestern Polytechnical University, Xi’an, Shaanxi 710072, China

* Corresponding authors: Xiaohui Wang (xiaohui.wang@ciac.ac.cn), Xiubo Du ([duxiubo@szu.edu.cn](mailto:duxiubo@szu.edu.cn))

# These authors contributed to this paper equally.

**Original data for Western Blot**

Lanes order of mouse brain samples, from left to right: Marker, WT-1, WT-2, WT-3, AD-1, AD-2, AD-3, AD+L-CBD-1, AD+L-CBD-2, AD+L-CBD-3, AD+H-CBD-1, AD+H-CBD-2, AD+H-CBD-3, Marker, Marker. Markers are sometimes not visible.

(WT: Wild-type, AD: Transgene, L-CBD: 20μM CBD, H-CBD: 40μM)

Fig 2F Original data for Western blot


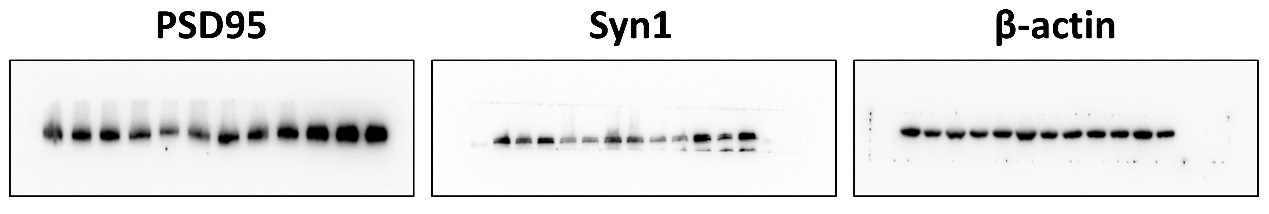


Lanes order of mouse brain samples, from left to right: Marker, WT-1, WT-2, WT-3, AD-1, AD-2, AD-3, AD+L-CBD-1, AD+L-CBD-2, AD+L-CBD-3, AD+H-CBD-1, AD+H-CBD-2, AD+H-CBD-3, Marker, Marker. Markers are sometimes not visible.

(WT: Wild-type, AD: Transgene, L-CBD: 20μM CBD, H-CBD: 40μM)

Fig 3B&D Original data for Western blot


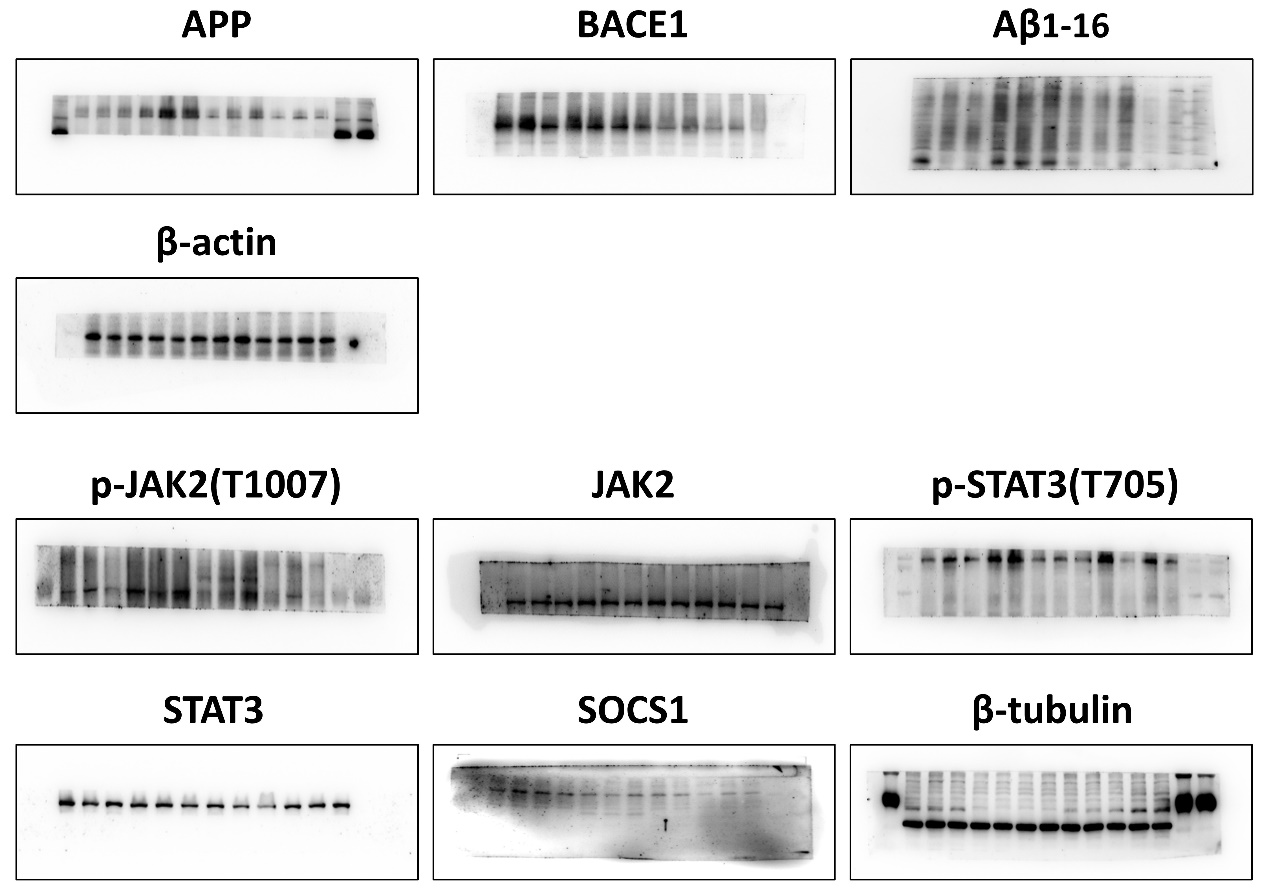


Lanes order of mouse brain samples, from left to right: Marker, WT-1, WT-2, WT-3, AD-1, AD-2, AD-3, AD+L-CBD-1, AD+L-CBD-2, AD+L-CBD-3, AD+H-CBD-1, AD+H-CBD-2, AD+H-CBD-3, Marker, Marker. Markers are sometimes not visible.

(WT: Wild-type, AD: Transgene, L-CBD: 20μM CBD, H-CBD: 40μM. The red-framed area is the selected region.)

Fig 3J Original data for Western blot


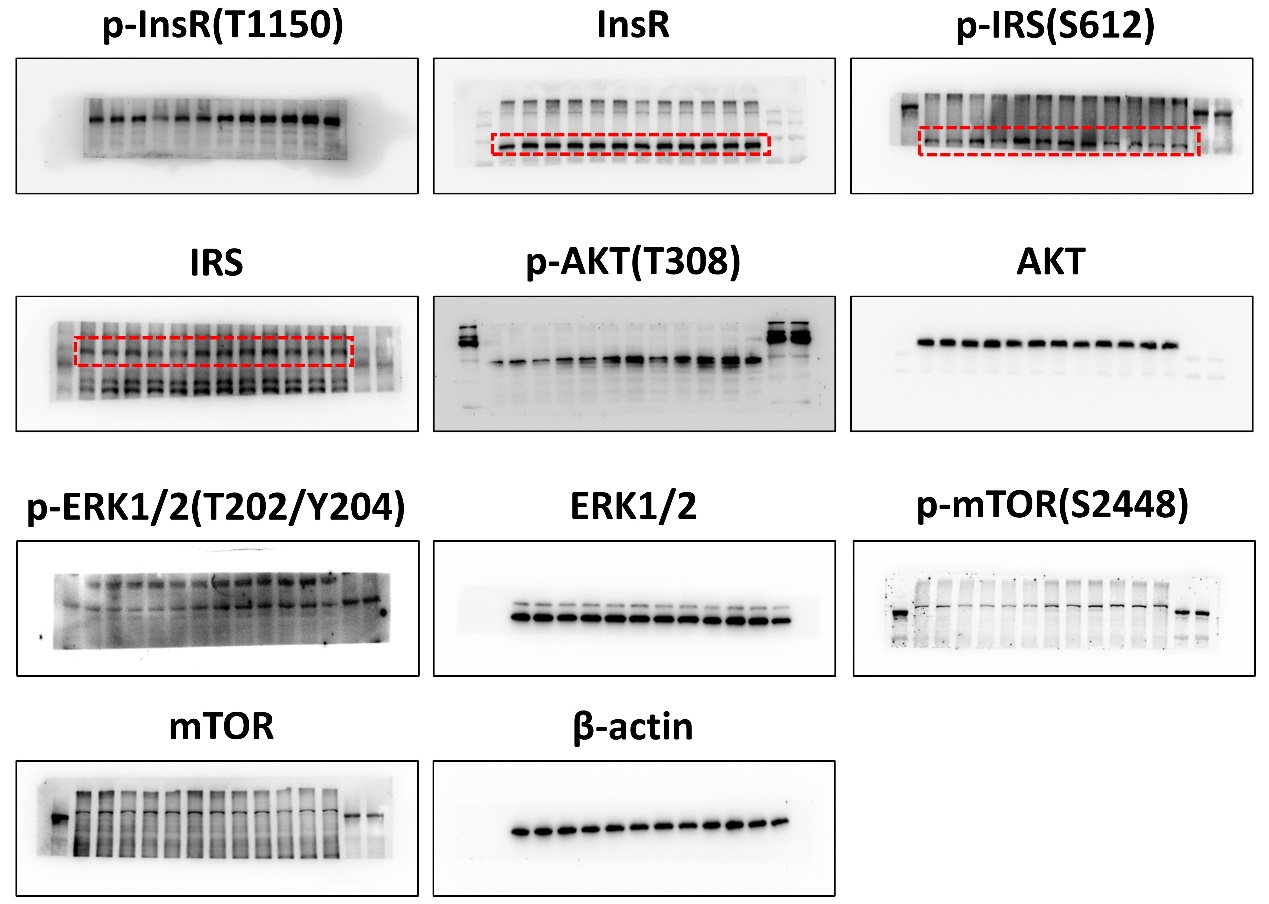


Lanes order of mouse brain samples, from left to right: Marker, WT-1, WT-2, WT-3, AD-1, AD-2, AD-3, AD+L-CBD-1, AD+L-CBD-2, AD+L-CBD-3, AD+H-CBD-1, AD+H-CBD-2, AD+H-CBD-3, Marker, Marker. Markers are sometimes not visible.

(WT: Wild-type, AD: Transgene, L-CBD: 20μM CBD, H-CBD: 40μM. The red-framed area is the selected region.)

Fig 4E&G Original data for Western blot


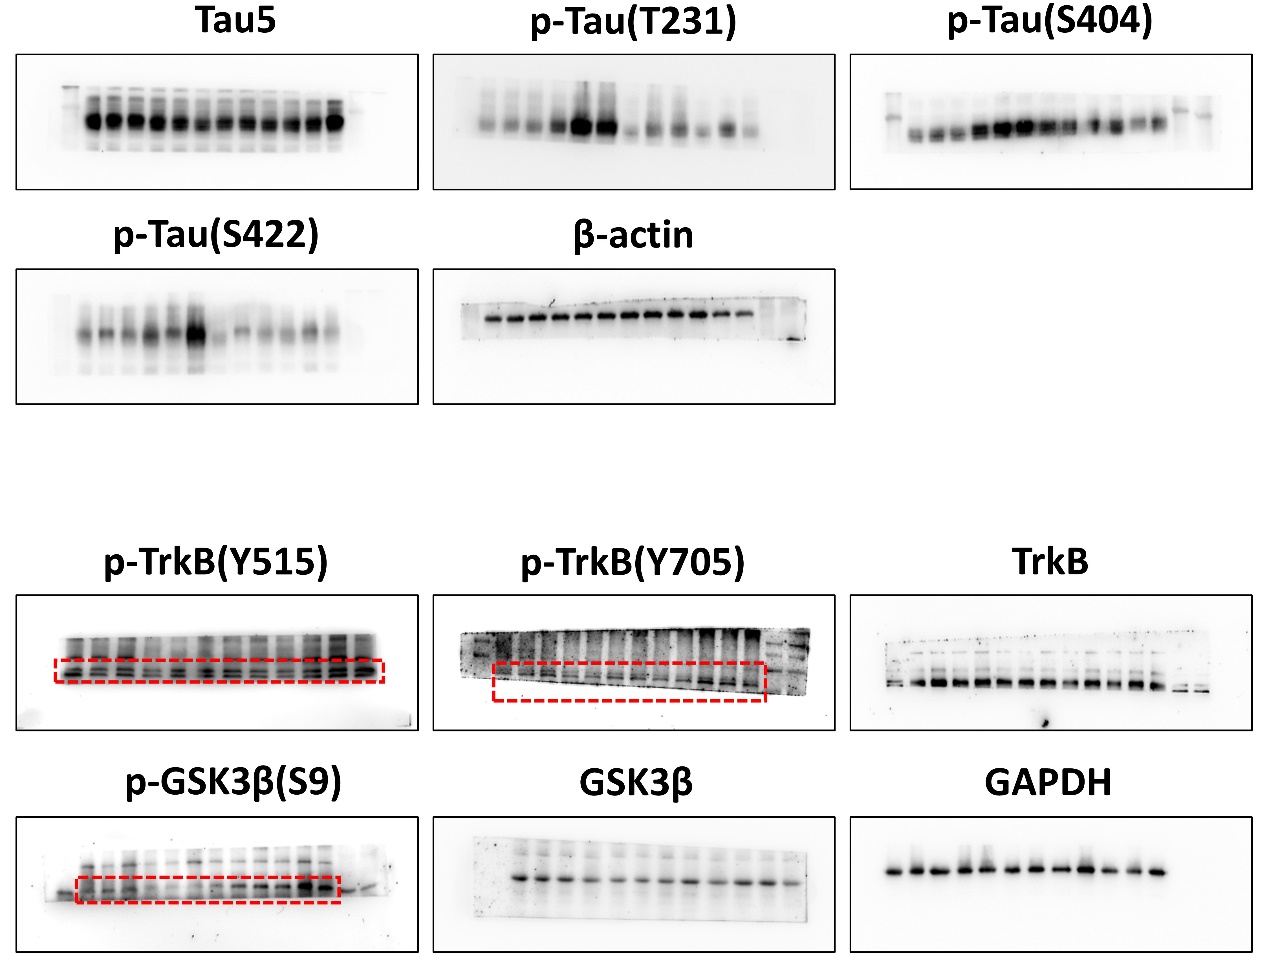


Lanes order of Hek293 cell samples, from left to right: Marker, CBD0-1, CBD0.1-1, CBD1-1, CBD3-1, CBD5-1, CBD7-1, CBD10-1, CBD0-2, CBD0.1-2, CBD1-2, CBD3-2, CBD5-2, CBD7-2, CBD10-2, Marker. Markers are sometimes not visible. (0-10 represent the concentrations of CBD treatment (μM). The red-framed area is the selected region.)

Fig S4A Original data for Western blot


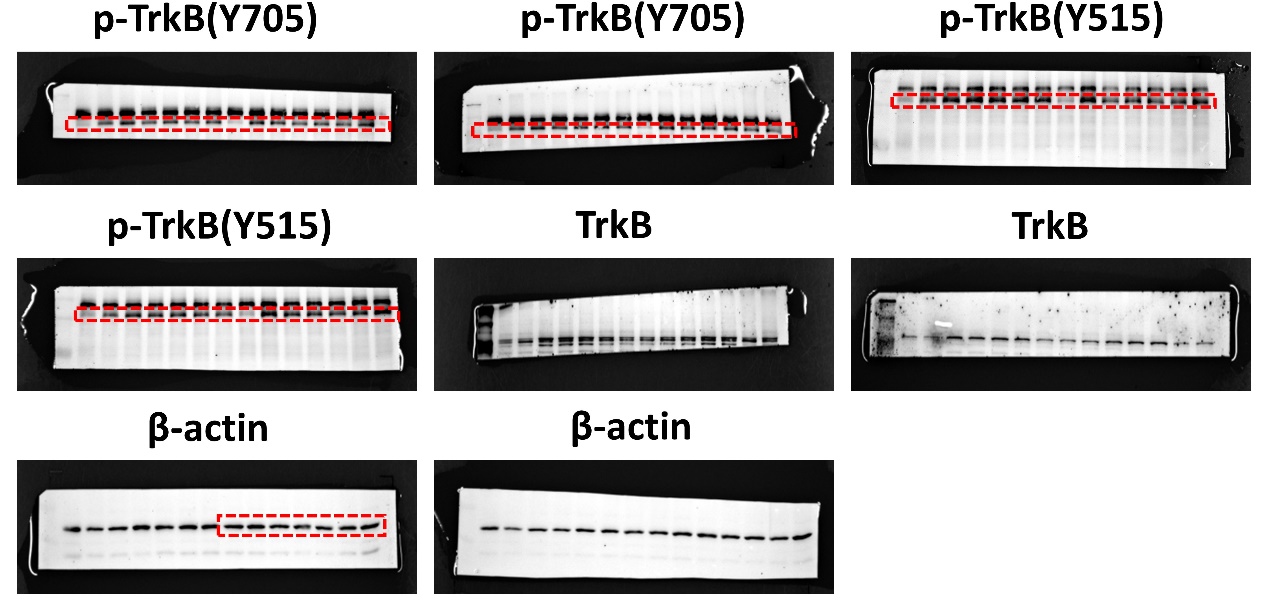


Lanes order of Hek293 cell samples, from left to right: Marker, CBD0-1, CBD10-1, CBD30-1, CBD180-1, CBD360-1, CBD720-1, CBD1440-1, CBD0-2, CBD10-2, CBD30-2, CBD180-2, CBD360-2, CBD720-2, CBD1440-2, Marker. Markers are sometimes not visible. (0-1440 represent the time points of CBD treatment (min). The red-framed area is the selected region.)

Fig S4D Original data for Western blot


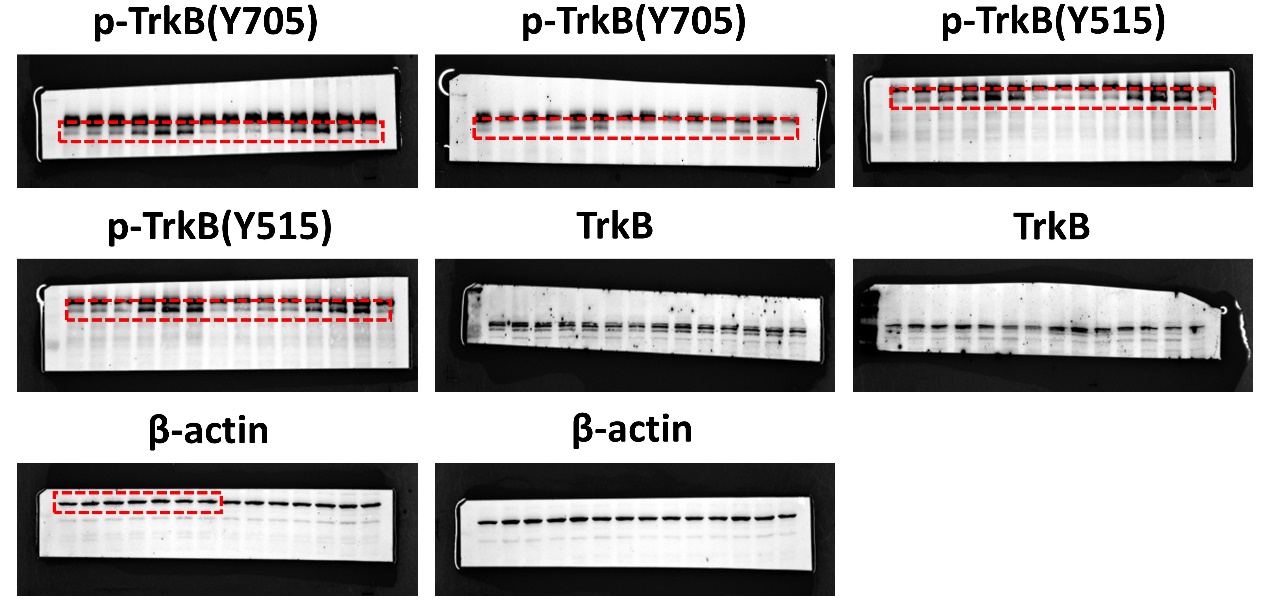


Lanes order of Hek293 cell samples and mouse brain samples. The red-boxed areas for the three samples are in the following order: DMSO, CBD, CBD+shFRS2. The corresponding red-boxed areas for the nine samples are in the order of DMSO-1, DMSO-2, DMSO-3, CBD-1, CBD-2, CBD-3, CBD+shFRS2-1, CBD+shFRS2-2, and CBD+shFRS2-3, which are used for statistical analysis. Additionally, the order of the WB (Western Blot) images for AKT and ERK is DMSO-1, DMSO-2, DMSO-3, CBD-1, CBD-2, and CBD-3.

The WB images for FRS2 and BDNF use mouse brain tissue samples. For the FRS2 image, the loading order within the red box is WT-1, WT-2, WT-3, WT+shFRS2-1, WT+shFRS2-2, and WT+shFRS2-3. For the BDNF image, the loading order within the red box is AD-1, AD-2, AD-3, AD+CBD-1, AD+CBD-2, and AD+CBD-3.

Fig S4G&K&N&P Original data for Western blot


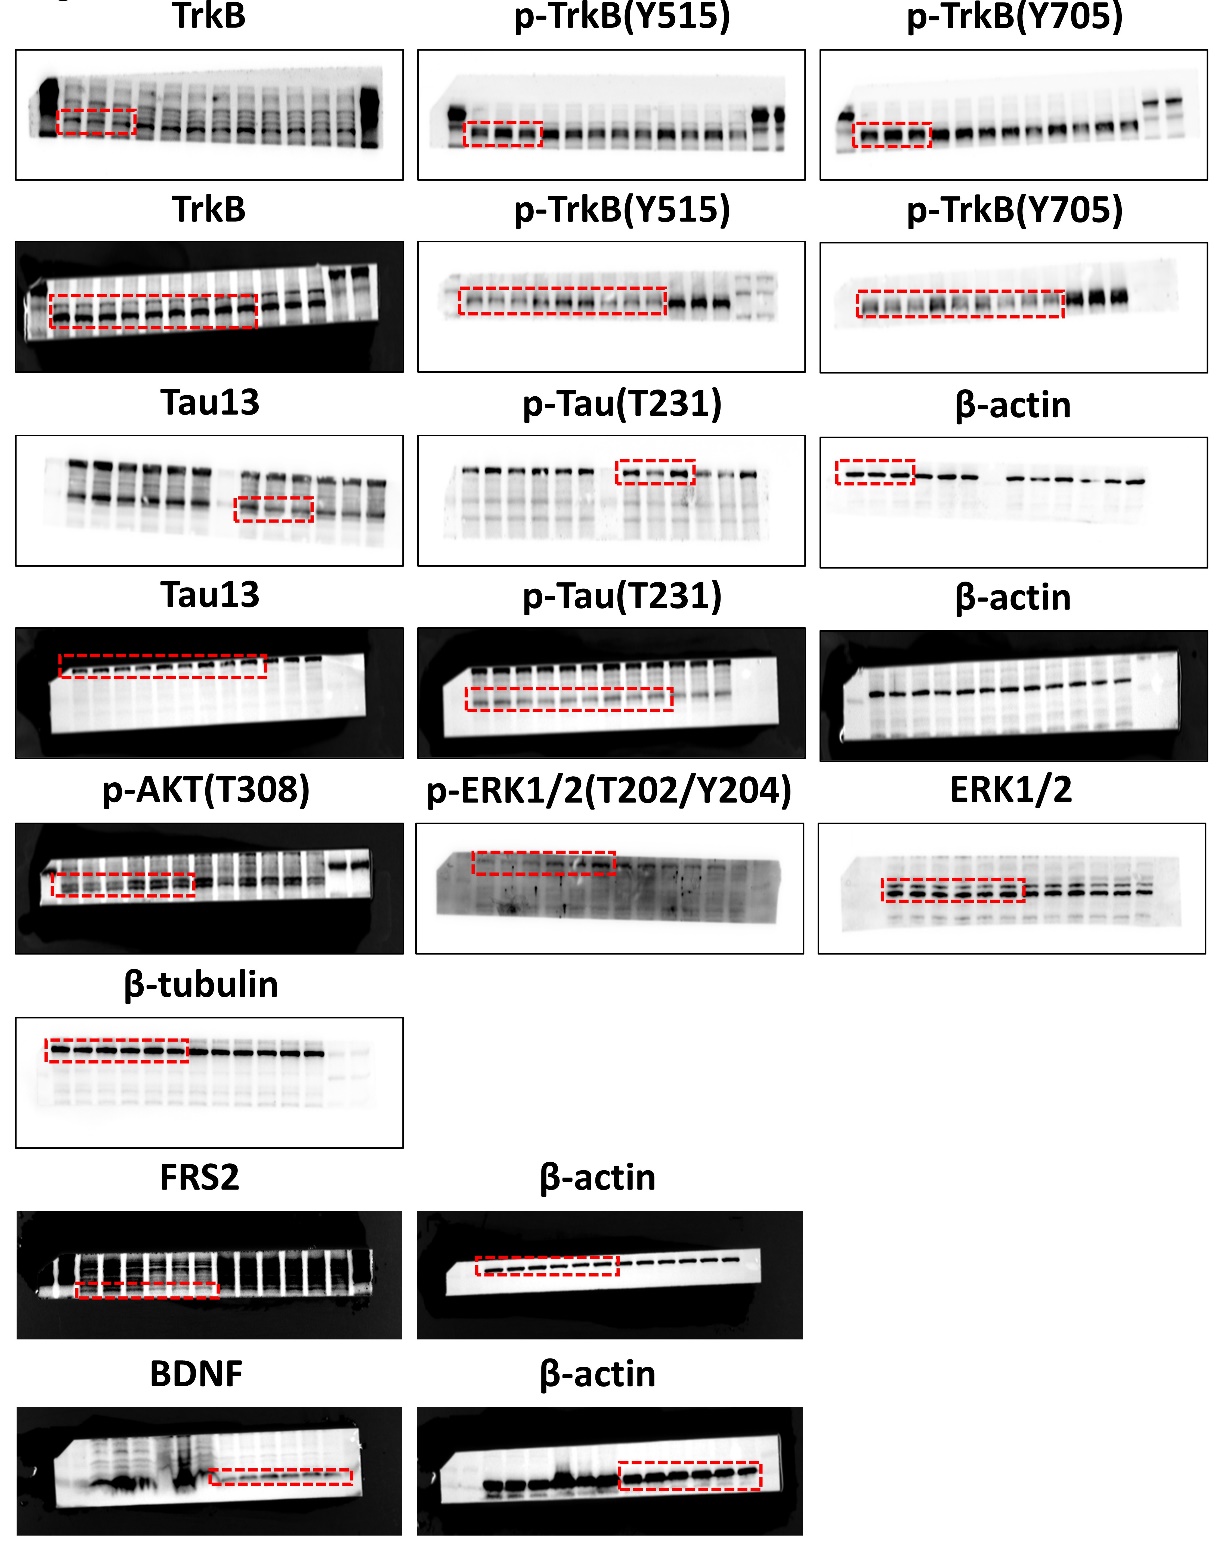


Lanes order of Hek293 cell samples, from left to right: Marker, 41-CBD, 41-DMSO, 44-CBD, 44-DMSO, 47-CBD, 47-DMSO, 50-CBD, 50-DMSO, 53-CBD, 53-DMSO, 56-CBD, 56-DMSO, 59-CBD, 59-DMSO. Markers are sometimes not visible. 41-59 represent the treatment temperatures (℃).

Fig 5E Original data for Western blot


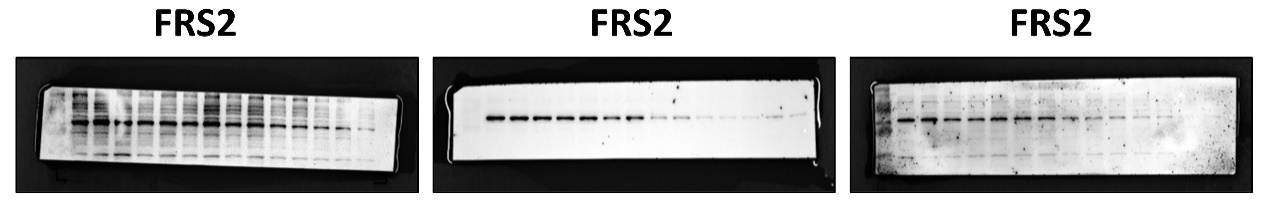


The order of the red-boxed areas in the four lanes is: WT, AD, AD+CBD, AD+CBD+shFRS2, which are used for the figures in the main text. (The samples were derived from either wild-type mice or triple-transgenic AD model mice.)

Fig 6G&I Original data for Western blot


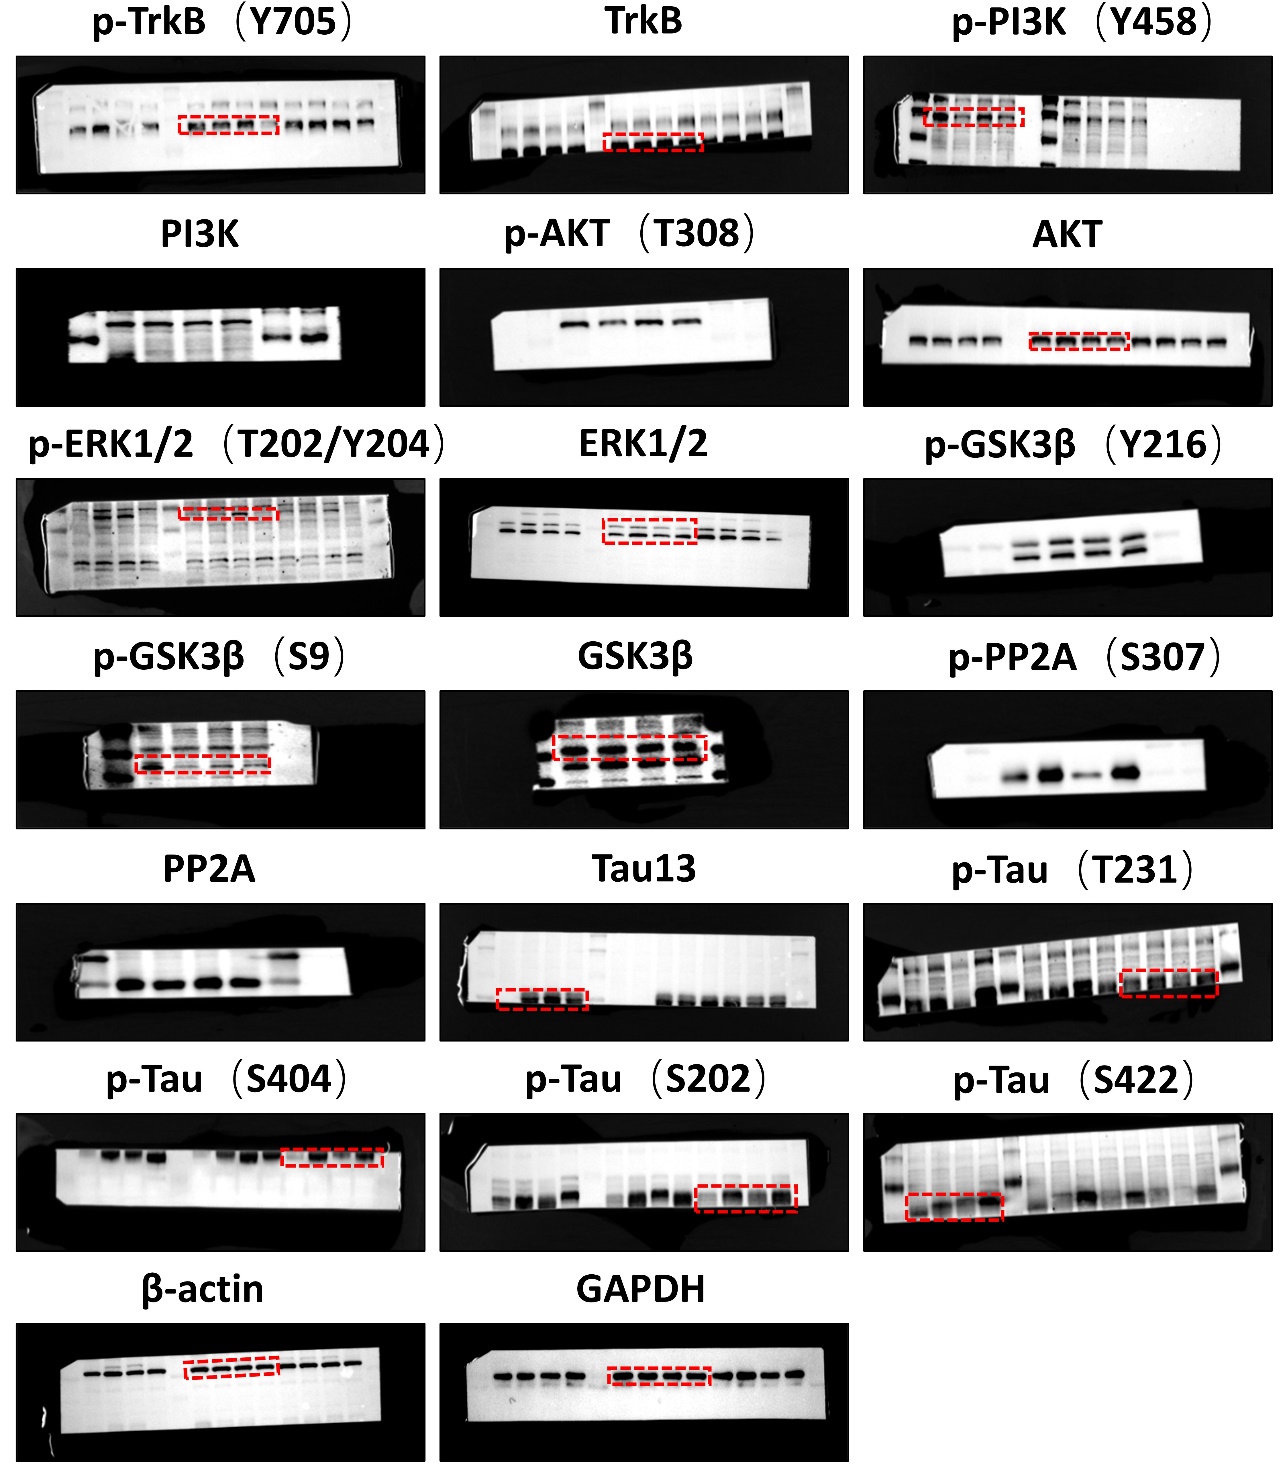


The order of the 12 lanes is: WT-1, WT-2, WT-3, AD-1, AD-2, AD-3, AD+CBD-1, AD+CBD-2, AD+CBD-3, AD+CBD+shFRS2-1, AD+CBD+shFRS2-2, AD+CBD+shFRS2-3. This part is used as the display figure, and the corresponding statistical data are obtained accordingly. The special red-boxed areas follow the loading order of the display figure. (The samples were derived from either wild-type mice or triple-transgenic AD model mice.)

Fig 6K Original data for Western blot


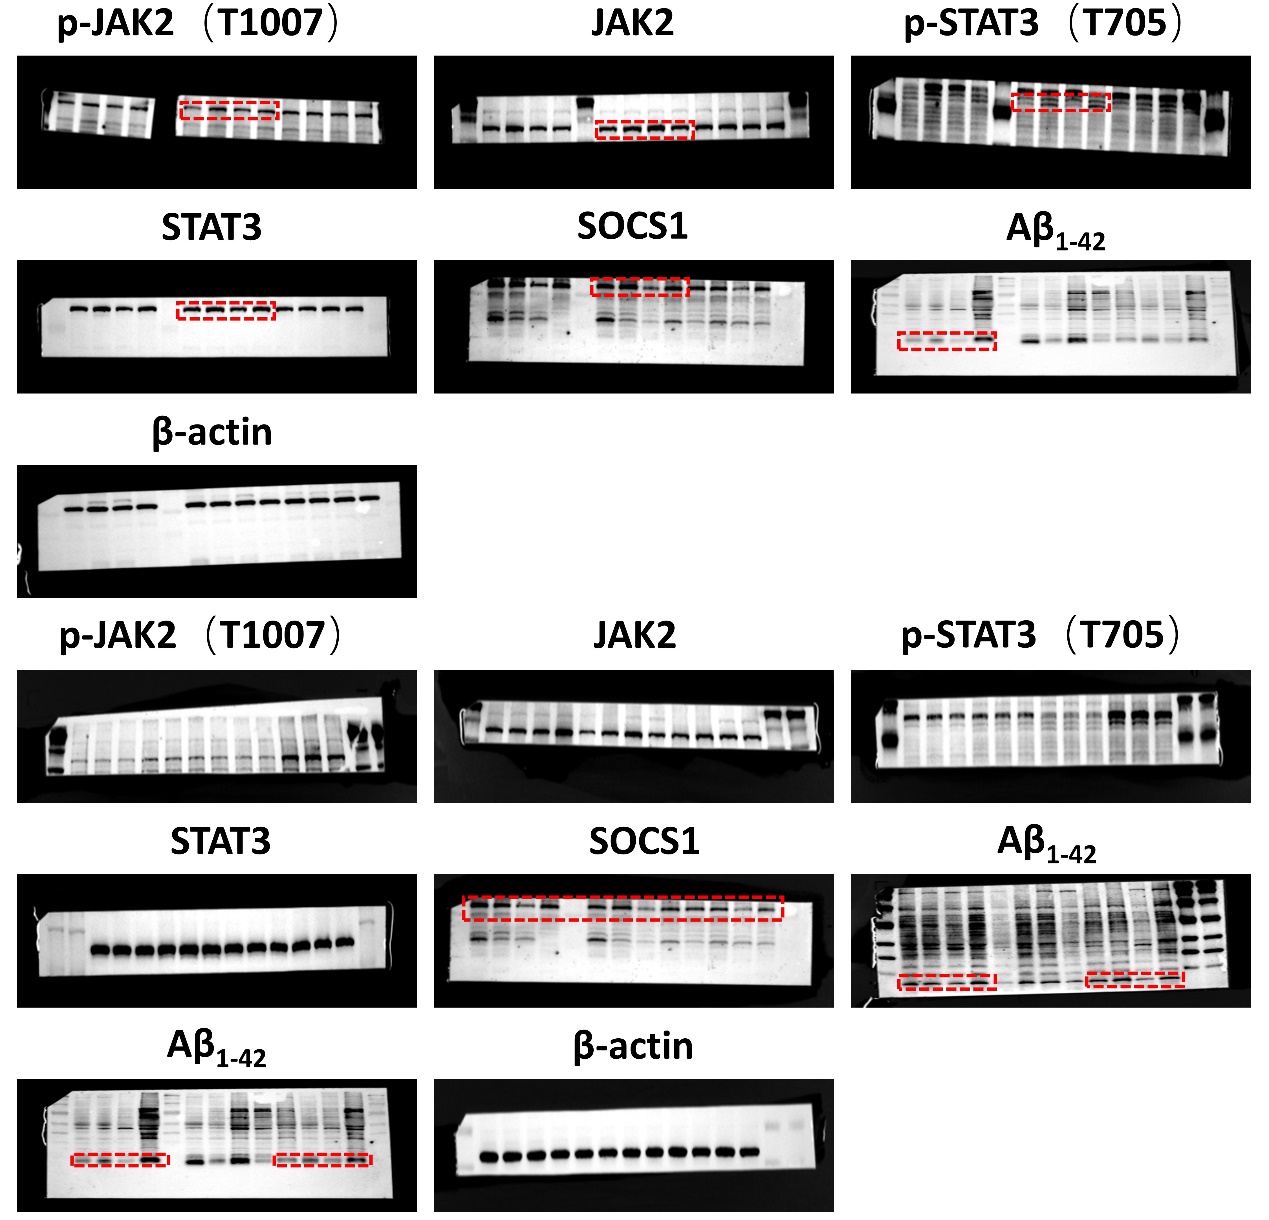


The order of the 12 lanes is: WT-1, WT-2, WT-3, AD-1, AD-2, AD-3, AD+CBD-1, AD+CBD-2, AD+CBD-3, AD+CBD+shFRS2-1, AD+CBD+shFRS2-2, AD+CBD+shFRS2-3. This part is used as the display figure, and the corresponding statistical data are obtained accordingly. The special red-boxed areas follow the loading order of the display figure. (The samples were derived from either wild-type mice or triple-transgenic AD model mice.)

Fig 6H&J Original data for Western blot


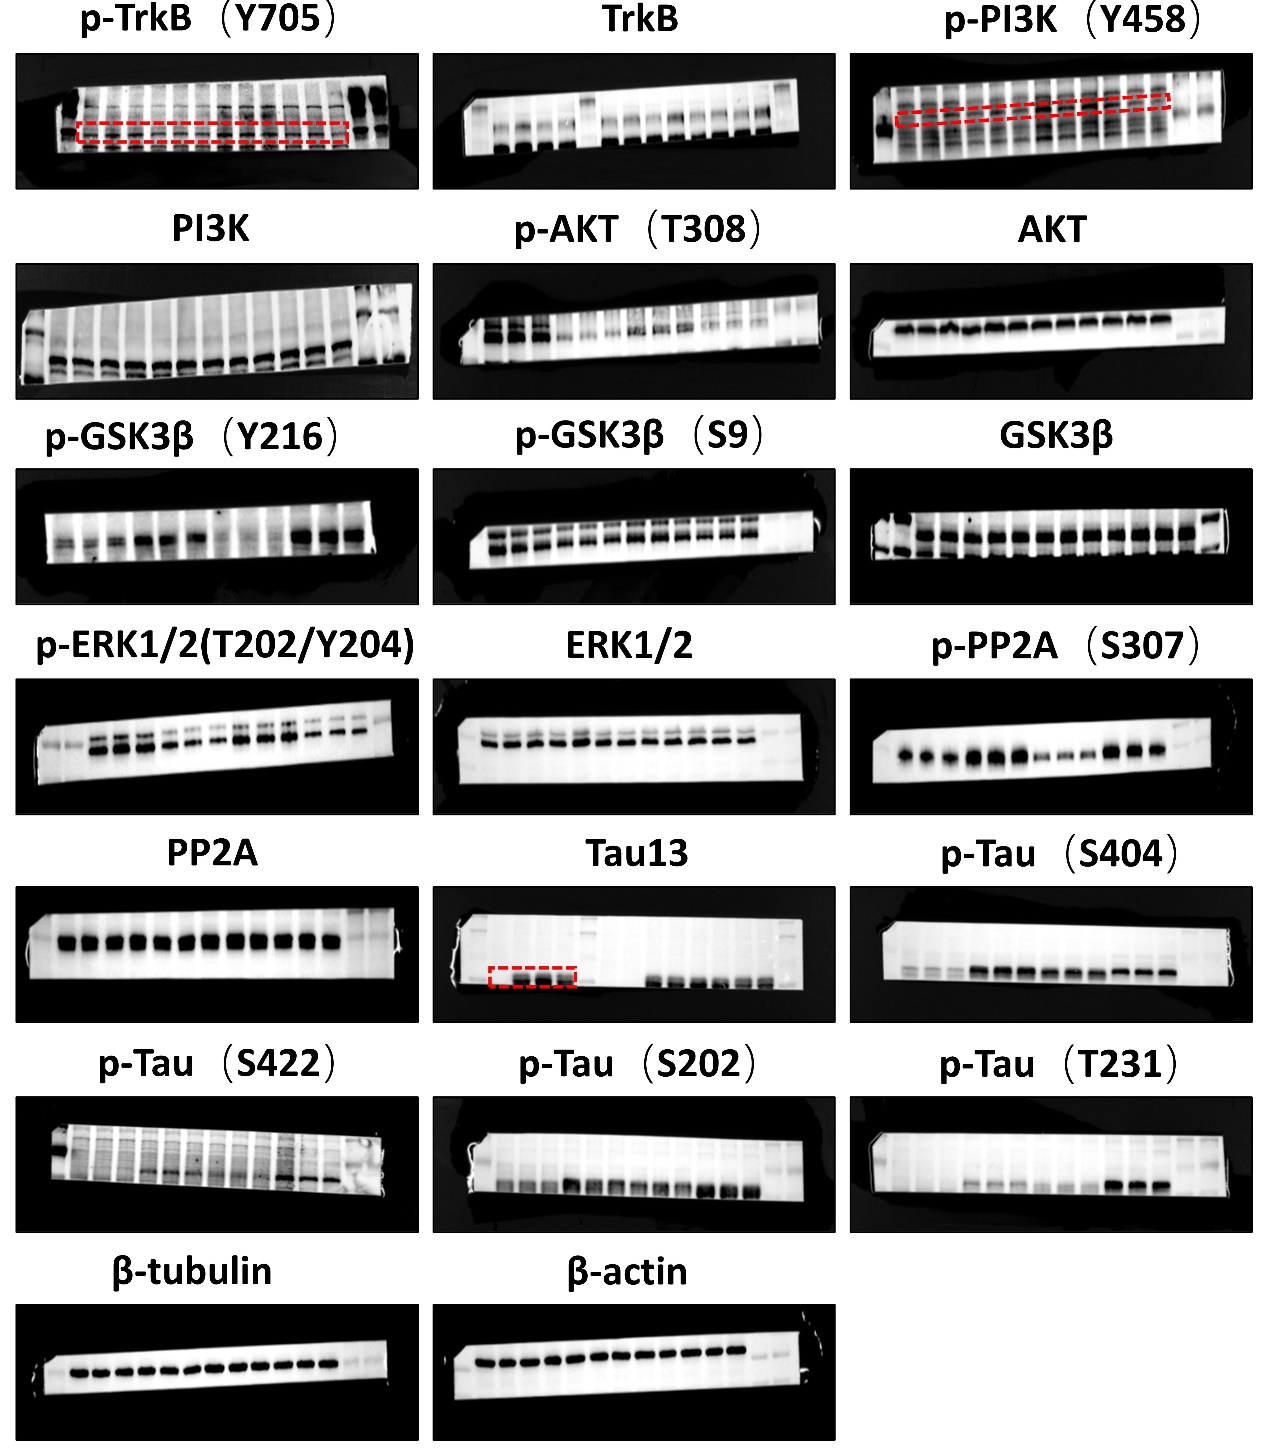

Supplement: Supplementary file 3 [file bbbfdcbab5203e97a7ec55dc.docx]
