# Supplementary material for: Mechanistic Insights into Cannabidiol-Mediated TrkB Activation via FRS2 Interaction in Attenuating Alzheimer's Disease Pathology and Cognitive Impairment
Source: Research Square preprint supplement (doi:10.21203/rs.3.rs-6659468/v1), 2025-07-28
Supplement: Supplementary file 2 [file 6bd179800a63080c01c8f7d8.docx]

**ANTIBODY DIRECTORY**

| ANTIBODIES | SOURCE | IDENTIFIER |
| --- | --- | --- |
| MAP2 | Abcam | ab5392 |
| PSD95 | Abcam | ab18258 |
| Synapsin-1(Syn1) | Immunoway | YT4483 |
| APP | Abcam | ab32136 |
| BACE1 | peoteinech | 12807-1-AP |
| 6E10 (Aβ1-16) | Biolegend | SIG 39300 |
| GFAP | Abcam | ab7260 |
| AT8 | Invitrogen | MN1020 |
| Tau5 | Abcam | ab80579 |
| pT231-Tau | Abcam | ab151559 |
| pS404-Tau | Abcam | ab92676 |
| pS422-Tau | Abcam | ab79415 |
| pS202-Tau | Abcam | ab108387 |
| mTOR | CST | 2972S |
| pS2448-mTOR | CST | 2971S |
| IRS | CST | 2382S |
| pS612-IRS | CST | 2386S |
| InsR | CST | 3025S |
| pY1150-InsR | CST | 3024S |
| JAK2 | CST | 3230S |
| pY1007-JAK2 | CST | 3776S |
| STAT3 | CST | 12640S |
| pY705-STAT3 | CST | 9145S |
| SOCS1 | CST | 3950S |
| pY705-TrkB | Abcam | ab229908 |
| pY515-TrkB | Abcam | ab109684 |
| TrkB | Abcam | ab187041 |
| pT308-AKT | Abcam | ab38449 |
| AKT | Abcam | ab179463 |
| p(T202/Y204)-ERK1/2 | Abcam | ab214362 |
| ERK | Abcam | ab17942 |
| GSK3β | Abcam | ab131097 |
| pS9-GSK3β | Abcam | Ab75745 |
| PI3K | Abcom | ab86714 |
| p-PI3K(Y458) | CST | 17366S |
| Aβ1-42 | Biolegend | 805509 |
| β-tubulin | Proteintech | 10094-1-AP |
| β-actin | Proteintech | 66009-1-IG |
| GAPDH | abcam | ab181602 |
